# Supplementary material for: Prevalence and Factors Associated with transfusion-transmissible infections among blood donors in Arua regional blood bank, Uganda
Source: PubMed Central journal article supplement — BMC Infect Dis. 2024 Sep 6;24:926. doi: 10.1186/s12879-024-09838-4 (PMC11380187; doi:10.1186/s12879-024-09838-4), 2024-09-06
Supplement: 12879_2024_9838_MOESM1_ESM.pdf [file 12879_2024_9838_MOESM1_ESM.pdf]

## DATA ABSTRACTION FORM

Please tick all the correct responses and fill in the missing gaps

1. Identifier number ( )

2. Background information

2.1 Age ( )

2.2 Sex of the blood donor Male ( ) Female ( )

2.3 District where the blood donor coming from.

a. Adjumani ( )

g. Nebbi ( )

b. Arua ( )

h. Obongi ( )

c. Koboko ( )

i. Pakwach ( )

d. Madi-Okollo ( )

j. Yumbe ( )

e. Maracha ( )

k. Zombo ( )

f. Moyo ( )

2.4 Presence of telephone contact number Present ( ) Absent ( )

3. Blood donor factors

3.1 First blood donor? a. New ( ) b. Repeat ( ) c. Lapsed ( )

3.2 Abnormal blood test results

- a. Hepatitis B Virus ( )
- b. Hepatitis C Virus ( )
- c. HIV ( )
- d. Syphilis ( )
- e. Other ( )

3.4 Type of donor      a. VNRBD ( )      b. Replacement Donor ( )

3.5 Blood Pressure      Systolic ( )      Diastolic ( )

3.6 Hemoglobin level ( )

3.7 Blood group

- a. A { }
- b. AB { }
- c. B { }
- d. O { }

3.8 Rhesus factor      a. D+ ( )      b. D- ( )

4. System factors:

4.1 Where was the blood donation conducted from?

- a. Field ( )

b. At the Blood Bank ( )

4.2 Blood donor notified of results

a. Yes ( )

b. No ( )

4.3 Attempt to reach the blood donor by phone?

a. ....

b. ....

c. ....

d. ....
